# Supplementary material
Source: MDPI journal article supplement (https://www.mdpi.com/2227-9040/9/9/258)
Supplement: s1 [file s1]

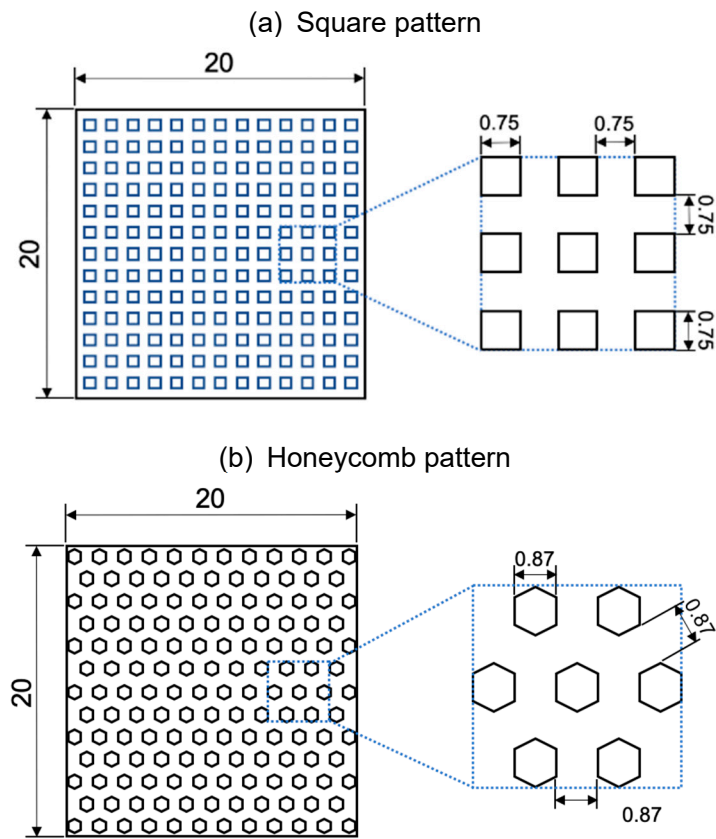

**Figure S1.** Designs of a square pattern and a honeycomb pattern were prepared and Figure 2. laser cutting machine. (units: mm).

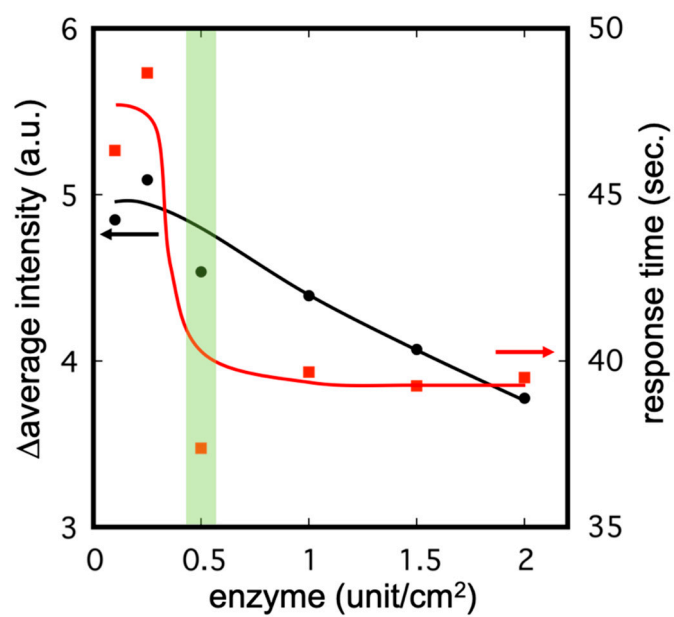

**Figure S2.** Comparison of fluorescence intensity (red plots) and 90% output response time (black plots) versus enzyme amount for imaging system.
